# Supplementary material for: Dissolved organic matter characteristics of deciduous and coniferous forests with variable management: different at the source, aligned in the soil
Source: Copernicus journal article supplement (doi:10.5194/bg-2018-478), 2018-11-12
Supplement: Supplementary file [file bg-2018-478-AC3-supplement.pdf]

Example of number\_of\_formulas for beech throughfall

|                         | Number of formulas | comments                                                                                                                                                                                                                                                                                                             |
|-------------------------|--------------------|----------------------------------------------------------------------------------------------------------------------------------------------------------------------------------------------------------------------------------------------------------------------------------------------------------------------|
| Registered peaks:       | 18010              |                                                                                                                                                                                                                                                                                                                      |
| Unique identified peaks | 9878               | using the constraints above mentioned in the reply                                                                                                                                                                                                                                                                   |
| Multiple identification | 2160               | These were not further considered, that means, we lose 12% of the peaks, but we exclude false positive ones                                                                                                                                                                                                          |
| Not listed peaks        | 5972               | most of all are $^{13}\text{C}$ isotopic peaks without further scientific information; or not assigned because not within constraints, e.g. CHOP, CHOS <sub>4</sub> , CHOS <sub>2</sub> N <sub>3</sub> , CHOS <sub>3</sub> N <sub>3</sub> ...; or the peaks are so small, that their exactness is smaller than 1 ppm |
